# Supplementary material
Source: publisher figshare collection journal article supplement (https://acs.figshare.com/ndownloader/files/5059204)
Supplement: Supplementary file 1 [file 5059204]

data_6g
 
_audit_creation_method            SHELXL-97
_chemical_name_systematic         
;
(1SR,2RS,3RS,3aSR,8aSR)-5,6,5,6-tetramethoxy-1,3-diphenyl-
3a,8a-dihydrospiro{cyclopenta[a]indene-2,2(1H,3H)indene}-1,8(3H)-dione
;
_chemical_name_common             ?
_chemical_melting_point           277-278
_chemical_formula_moiety          'C36 H32 O6'
_chemical_formula_sum
 'C36 H32 O6'
_chemical_formula_weight          560.62
 
loop_
 _atom_type_symbol
 _atom_type_description
 _atom_type_scat_dispersion_real
 _atom_type_scat_dispersion_imag
 _atom_type_scat_source
 'C'  'C'   0.0033   0.0016
 'International Tables Vol C Tables 4.2.6.8 and 6.1.1.4'
 'H'  'H'   0.0000   0.0000
 'International Tables Vol C Tables 4.2.6.8 and 6.1.1.4'
 'O'  'O'   0.0106   0.0060
 'International Tables Vol C Tables 4.2.6.8 and 6.1.1.4'
 
_symmetry_cell_setting            Monoclinic
_symmetry_space_group_name_H-M    P21/c
 
loop_
 _symmetry_equiv_pos_as_xyz
 'x, y, z'
 '-x, y+1/2, -z+1/2'
 '-x, -y, -z'
 'x, -y-1/2, z-1/2'
 
_cell_length_a                    11.904(5)
_cell_length_b                    21.892(11)
_cell_length_c                    11.857(8)
_cell_angle_alpha                 90.00
_cell_angle_beta                  106.53(3)
_cell_angle_gamma                 90.00
_cell_volume                      2962(3)
_cell_formula_units_Z             4
_cell_measurement_temperature     293(2)
_cell_measurement_reflns_used     29
_cell_measurement_theta_min       3
_cell_measurement_theta_max       31
 
_exptl_crystal_description        'prism'
_exptl_crystal_colour             ?
_exptl_crystal_size_max           0.2
_exptl_crystal_size_mid           0.1
_exptl_crystal_size_min           0.1
_exptl_crystal_density_meas       ?
_exptl_crystal_density_diffrn     1.257
_exptl_crystal_density_method     'not measured'
_exptl_crystal_F_000              1184
_exptl_absorpt_coefficient_mu     0.085
_exptl_absorpt_correction_type    none
_exptl_absorpt_correction_T_min   ?
_exptl_absorpt_correction_T_max   ?
_exptl_absorpt_process_details    ?
 
_exptl_special_details
;
 ?
;
 
_diffrn_ambient_temperature       293(2)
_diffrn_radiation_wavelength      0.71073
_diffrn_radiation_type            MoK\a
_diffrn_radiation_source          'fine-focus sealed tube'
_diffrn_radiation_monochromator   graphite
_diffrn_measurement_device_type   'mar345 with a image plate detector'
_diffrn_measurement_method        'phi-scan'
_diffrn_detector_area_resol_mean  ?
_diffrn_standards_number          ?
_diffrn_standards_interval_count  ?
_diffrn_standards_interval_time   ?
_diffrn_standards_decay_%         ?
_diffrn_reflns_number             27884
_diffrn_reflns_av_R_equivalents   0.0414
_diffrn_reflns_av_sigmaI/netI     0.2350
_diffrn_reflns_limit_h_min        -17
_diffrn_reflns_limit_h_max        16
_diffrn_reflns_limit_k_min        0
_diffrn_reflns_limit_k_max        33
_diffrn_reflns_limit_l_min        0
_diffrn_reflns_limit_l_max        16
_diffrn_reflns_theta_min          3.52
_diffrn_reflns_theta_max          33.27
_reflns_number_total              8877
_reflns_number_gt                 2478
_reflns_threshold_expression      >2sigma(I)
 
_computing_data_collection        ?
_computing_cell_refinement        ?
_computing_data_reduction         ?
_computing_structure_solution     ?
_computing_structure_refinement   'SHELXL-97 (Sheldrick, 1997)'
_computing_molecular_graphics     ?
_computing_publication_material   ?
 
_refine_special_details
;
 Refinement of F^2^ against ALL reflections.  The weighted R-factor wR and
 goodness of fit S are based on F^2^, conventional R-factors R are based
 on F, with F set to zero for negative F^2^. The threshold expression of
 F^2^ > 2sigma(F^2^) is used only for calculating R-factors(gt) etc. and is
 not relevant to the choice of reflections for refinement.  R-factors based
 on F^2^ are statistically about twice as large as those based on F, and R-
 factors based on ALL data will be even larger.
;
 
_refine_ls_structure_factor_coef  Fsqd
_refine_ls_matrix_type            full
_refine_ls_weighting_scheme       calc
_refine_ls_weighting_details
 'calc w=1/[\s^2^(Fo^2^)+(0.0000P)^2^+0.0000P] where P=(Fo^2^+2Fc^2^)/3'
_atom_sites_solution_primary      direct
_atom_sites_solution_secondary    difmap
_atom_sites_solution_hydrogens    geom
_refine_ls_hydrogen_treatment     mixed
_refine_ls_extinction_method      none
_refine_ls_extinction_coef        ?
_refine_ls_number_reflns          8877
_refine_ls_number_parameters      379
_refine_ls_number_restraints      0
_refine_ls_R_factor_all           0.3089
_refine_ls_R_factor_gt            0.0519
_refine_ls_wR_factor_ref          0.0835
_refine_ls_wR_factor_gt           0.0516
_refine_ls_goodness_of_fit_ref    0.811
_refine_ls_restrained_S_all       0.811
_refine_ls_shift/su_max           0.000
_refine_ls_shift/su_mean          0.000
 
loop_
 _atom_site_label
 _atom_site_type_symbol
 _atom_site_fract_x
 _atom_site_fract_y
 _atom_site_fract_z
 _atom_site_U_iso_or_equiv
 _atom_site_adp_type
 _atom_site_occupancy
 _atom_site_symmetry_multiplicity
 _atom_site_calc_flag
 _atom_site_refinement_flags
 _atom_site_disorder_assembly
 _atom_site_disorder_group
O1 O 0.87855(14) -0.05475(7) 0.00785(13) 0.0595(5) Uani 1 1 d . . .
O2 O 0.88783(15) -0.04233(7) 0.22272(14) 0.0615(5) Uani 1 1 d . . .
O3 O 0.78160(15) 0.18170(7) -0.14718(13) 0.0621(5) Uani 1 1 d . . .
O4 O 0.83134(15) 0.41611(8) -0.02364(13) 0.0644(5) Uani 1 1 d . . .
O5 O 0.38333(16) 0.49679(8) -0.18972(14) 0.0683(5) Uani 1 1 d . . .
O6 O 0.27396(17) 0.41387(8) -0.11136(14) 0.0676(5) Uani 1 1 d . . .
C1 C 0.8358(2) 0.05321(11) -0.0308(2) 0.0543(7) Uani 1 1 d . . .
H1 H 0.8292 0.0483 -0.1104 0.065 Uiso 1 1 calc R . .
C2 C 0.8607(2) 0.00446(12) 0.0437(2) 0.0540(7) Uani 1 1 d . . .
C3 C 0.8662(2) 0.01187(12) 0.1607(2) 0.0558(7) Uani 1 1 d . . .
C4 C 0.8478(2) 0.06654(11) 0.2061(2) 0.0524(7) Uani 1 1 d . . .
H4 H 0.8495 0.0702 0.2847 0.063 Uiso 1 1 calc R . .
C5 C 0.8258(2) 0.11829(11) 0.1302(2) 0.0534(7) Uani 1 1 d . . .
C6 C 0.8200(2) 0.11232(12) 0.0153(2) 0.0559(7) Uani 1 1 d . . .
C7 C 0.7939(2) 0.16991(12) -0.0451(2) 0.0561(7) Uani 1 1 d . . .
C8 C 0.7786(2) 0.21824(11) 0.0451(2) 0.0539(7) Uani 1 1 d . . .
C9 C 0.8149(2) 0.18473(10) 0.16267(19) 0.0569(7) Uani 1 1 d . . .
H9A H 0.8891 0.2001 0.2119 0.068 Uiso 1 1 calc R . .
H9B H 0.7561 0.1894 0.2042 0.068 Uiso 1 1 calc R . .
C10 C 0.6493(2) 0.24337(11) 0.0043(2) 0.0566(7) Uani 1 1 d . . .
H10 H 0.6331 0.2540 -0.0791 0.068 Uiso 1 1 calc R . .
C11 C 0.6520(2) 0.30383(11) 0.0716(2) 0.0585(7) Uani 1 1 d . . .
H11 H 0.6415 0.2973 0.1498 0.070 Uiso 1 1 calc R . .
C12 C 0.7743(2) 0.32942(11) 0.0785(2) 0.0562(7) Uani 1 1 d . . .
H12 H 0.8150 0.3393 0.1606 0.067 Uiso 1 1 calc R . .
C13 C 0.8413(2) 0.27911(11) 0.0370(2) 0.0564(7) Uani 1 1 d . . .
H13 H 0.8309 0.2865 -0.0469 0.068 Uiso 1 1 calc R . .
C14 C 0.5571(2) 0.19755(11) 0.0128(2) 0.0586(7) Uani 1 1 d . . .
C15 C 0.5043(2) 0.16481(12) -0.0877(2) 0.0653(8) Uani 1 1 d . . .
H15 H 0.5259 0.1721 -0.1560 0.078 Uiso 1 1 calc R . .
C16 C 0.4190(2) 0.12091(12) -0.0888(2) 0.0722(8) Uani 1 1 d . . .
H16 H 0.3822 0.0996 -0.1572 0.087 Uiso 1 1 calc R . .
C17 C 0.3916(2) 0.11033(12) 0.0115(2) 0.0708(8) Uani 1 1 d . . .
H17 H 0.3370 0.0798 0.0106 0.085 Uiso 1 1 calc R . .
C18 C 0.4370(2) 0.14039(12) 0.1141(2) 0.0698(8) Uani 1 1 d . . .
H18 H 0.4147 0.1318 0.1814 0.084 Uiso 1 1 calc R . .
C19 C 0.5243(2) 0.18769(11) 0.1116(2) 0.0640(7) Uani 1 1 d . . .
H19 H 0.5570 0.2110 0.1785 0.077 Uiso 1 1 calc R . .
C20 C 0.9751(2) 0.27662(11) 0.0961(2) 0.0597(7) Uani 1 1 d . . .
C21 C 1.0313(3) 0.29985(11) 0.2060(2) 0.0625(7) Uani 1 1 d . . .
H21 H 0.9874 0.3191 0.2491 0.075 Uiso 1 1 calc R . .
C22 C 1.1498(2) 0.29531(12) 0.2527(2) 0.0639(7) Uani 1 1 d . . .
H22 H 1.1850 0.3130 0.3255 0.077 Uiso 1 1 calc R . .
C23 C 1.2190(2) 0.26486(12) 0.1942(2) 0.0675(8) Uani 1 1 d . . .
H23 H 1.2996 0.2613 0.2267 0.081 Uiso 1 1 calc R . .
C24 C 1.1642(3) 0.24070(12) 0.0886(3) 0.0680(8) Uani 1 1 d . . .
H24 H 1.2081 0.2190 0.0485 0.082 Uiso 1 1 calc R . .
C25 C 1.0483(3) 0.24674(12) 0.0390(2) 0.0657(8) Uani 1 1 d . . .
H25 H 1.0153 0.2306 -0.0357 0.079 Uiso 1 1 calc R . .
C26 C 0.7544(3) 0.38778(12) 0.0070(2) 0.0607(8) Uani 1 1 d . . .
C27 C 0.6328(3) 0.39840(12) -0.0329(2) 0.0590(7) Uani 1 1 d . . .
C28 C 0.5696(3) 0.35175(12) 0.0027(2) 0.0569(7) Uani 1 1 d . . .
C29 C 0.4533(3) 0.35405(12) -0.0207(2) 0.0622(7) Uani 1 1 d . . .
H29 H 0.4134 0.3225 0.0038 0.075 Uiso 1 1 calc R . .
C30 C 0.3882(3) 0.40628(12) -0.0851(2) 0.0617(7) Uani 1 1 d . . .
C31 C 0.4560(3) 0.45181(13) -0.1255(2) 0.0632(7) Uani 1 1 d . . .
C32 C 0.5654(3) 0.44797(13) -0.1008(2) 0.0651(8) Uani 1 1 d . . .
H32 H 0.6056 0.4786 -0.1275 0.078 Uiso 1 1 calc R . .
C33 C 0.8638(2) -0.06475(10) -0.11343(19) 0.0620(7) Uani 1 1 d . . .
H33A H 0.8767 -0.1071 -0.1264 0.093 Uiso 1 1 calc R . .
H33B H 0.9190 -0.0403 -0.1388 0.093 Uiso 1 1 calc R . .
H33C H 0.7856 -0.0536 -0.1574 0.093 Uiso 1 1 calc R . .
C34 C 0.9002(2) -0.03821(11) 0.3439(2) 0.0698(8) Uani 1 1 d . . .
H34A H 0.9142 -0.0781 0.3785 0.105 Uiso 1 1 calc R . .
H34B H 0.8297 -0.0217 0.3558 0.105 Uiso 1 1 calc R . .
H34C H 0.9650 -0.0120 0.3801 0.105 Uiso 1 1 calc R . .
C35 C 0.4336(2) 0.54288(11) -0.2367(2) 0.0709(8) Uani 1 1 d . . .
H35A H 0.3738 0.5705 -0.2793 0.106 Uiso 1 1 calc R . .
H35B H 0.4737 0.5259 -0.2892 0.106 Uiso 1 1 calc R . .
H35C H 0.4885 0.5646 -0.1746 0.106 Uiso 1 1 calc R . .
C36 C 0.2053(2) 0.36702(12) -0.0775(2) 0.0716(8) Uani 1 1 d . . .
H36A H 0.1238 0.3777 -0.1046 0.107 Uiso 1 1 calc R . .
H36B H 0.2285 0.3632 0.0066 0.107 Uiso 1 1 calc R . .
H36C H 0.2177 0.3288 -0.1120 0.107 Uiso 1 1 calc R . .
 
loop_
 _atom_site_aniso_label
 _atom_site_aniso_U_11
 _atom_site_aniso_U_22
 _atom_site_aniso_U_33
 _atom_site_aniso_U_23
 _atom_site_aniso_U_13
 _atom_site_aniso_U_12
O1 0.0600(13) 0.0626(12) 0.0567(10) -0.0048(9) 0.0180(9) -0.0023(10)
O2 0.0698(13) 0.0605(12) 0.0550(10) 0.0002(9) 0.0192(10) 0.0031(10)
O3 0.0732(14) 0.0641(12) 0.0504(10) 0.0051(9) 0.0199(10) -0.0011(10)
O4 0.0675(14) 0.0624(12) 0.0607(11) 0.0058(9) 0.0144(10) -0.0055(11)
O5 0.0698(14) 0.0636(13) 0.0661(11) 0.0070(10) 0.0106(11) -0.0015(11)
O6 0.0639(15) 0.0685(13) 0.0672(11) 0.0055(9) 0.0135(11) 0.0012(12)
C1 0.0558(18) 0.0607(18) 0.0479(14) -0.0041(13) 0.0173(13) -0.0043(14)
C2 0.0535(18) 0.0552(18) 0.0543(15) -0.0030(13) 0.0167(14) -0.0005(14)
C3 0.0550(19) 0.0558(18) 0.0563(15) 0.0051(14) 0.0153(14) 0.0017(14)
C4 0.0515(18) 0.0542(17) 0.0493(14) 0.0012(13) 0.0109(13) 0.0025(13)
C5 0.0503(19) 0.0559(18) 0.0530(15) -0.0074(13) 0.0133(13) -0.0022(14)
C6 0.056(2) 0.0598(18) 0.0520(15) -0.0010(14) 0.0148(14) -0.0046(15)
C7 0.058(2) 0.0585(19) 0.0531(15) -0.0003(13) 0.0178(14) -0.0047(14)
C8 0.0555(19) 0.0516(17) 0.0536(15) 0.0012(13) 0.0141(14) -0.0029(14)
C9 0.0596(19) 0.0613(18) 0.0498(15) 0.0015(13) 0.0157(14) -0.0025(14)
C10 0.064(2) 0.0549(17) 0.0505(14) 0.0081(13) 0.0153(14) -0.0028(15)
C11 0.068(2) 0.0560(18) 0.0512(14) 0.0023(13) 0.0158(14) -0.0004(15)
C12 0.061(2) 0.0531(17) 0.0522(15) 0.0023(13) 0.0132(14) 0.0001(14)
C13 0.062(2) 0.0553(18) 0.0518(14) 0.0060(12) 0.0165(15) -0.0028(14)
C14 0.060(2) 0.0590(18) 0.0549(15) -0.0008(14) 0.0141(15) 0.0030(15)
C15 0.061(2) 0.0581(19) 0.0778(19) 0.0038(16) 0.0209(17) 0.0008(15)
C16 0.074(2) 0.074(2) 0.072(2) -0.0091(15) 0.0258(17) -0.0039(17)
C17 0.066(2) 0.071(2) 0.078(2) -0.0022(17) 0.0235(17) -0.0096(16)
C18 0.069(2) 0.073(2) 0.0725(19) 0.0114(16) 0.0280(17) 0.0037(17)
C19 0.064(2) 0.0644(19) 0.0640(17) 0.0086(14) 0.0180(15) 0.0041(16)
C20 0.069(2) 0.0548(18) 0.0594(17) -0.0019(14) 0.0243(16) -0.0034(15)
C21 0.063(2) 0.0601(19) 0.0668(17) 0.0041(14) 0.0233(16) -0.0015(16)
C22 0.067(2) 0.0646(19) 0.0601(16) -0.0036(14) 0.0181(16) -0.0077(16)
C23 0.066(2) 0.069(2) 0.0674(18) -0.0001(16) 0.0180(17) -0.0056(17)
C24 0.066(2) 0.066(2) 0.0743(19) 0.0003(16) 0.0238(18) -0.0029(18)
C25 0.066(2) 0.069(2) 0.0626(18) -0.0033(14) 0.0194(17) -0.0013(17)
C26 0.066(2) 0.063(2) 0.0519(16) -0.0002(14) 0.0145(16) -0.0079(17)
C27 0.064(2) 0.0589(19) 0.0522(15) 0.0026(13) 0.0131(14) -0.0009(16)
C28 0.060(2) 0.0586(19) 0.0498(15) 0.0023(13) 0.0114(15) -0.0007(16)
C29 0.069(2) 0.0558(18) 0.0603(16) 0.0011(14) 0.0159(16) 0.0002(17)
C30 0.060(2) 0.063(2) 0.0584(16) -0.0007(14) 0.0119(16) 0.0008(17)
C31 0.071(2) 0.054(2) 0.0615(17) 0.0043(14) 0.0148(17) -0.0032(18)
C32 0.070(2) 0.064(2) 0.0604(17) -0.0019(15) 0.0167(17) -0.0075(18)
C33 0.0594(19) 0.0631(18) 0.0634(16) -0.0083(13) 0.0174(14) -0.0021(15)
C34 0.085(2) 0.0587(18) 0.0676(17) 0.0083(14) 0.0248(16) 0.0110(16)
C35 0.072(2) 0.062(2) 0.0724(18) 0.0071(15) 0.0104(16) -0.0057(17)
C36 0.066(2) 0.078(2) 0.0723(18) 0.0072(15) 0.0228(17) 0.0020(17)
 
_geom_special_details
;
 All esds (except the esd in the dihedral angle between two l.s. planes)
 are estimated using the full covariance matrix.  The cell esds are taken
 into account individually in the estimation of esds in distances, angles
 and torsion angles; correlations between esds in cell parameters are only
 used when they are defined by crystal symmetry.  An approximate (isotropic)
 treatment of cell esds is used for estimating esds involving l.s. planes.
;
 
loop_
 _geom_bond_atom_site_label_1
 _geom_bond_atom_site_label_2
 _geom_bond_distance
 _geom_bond_site_symmetry_2
 _geom_bond_publ_flag
O1 C2 1.399(3) . ?
O1 C33 1.415(2) . ?
O2 C3 1.381(3) . ?
O2 C34 1.405(3) . ?
O3 C7 1.206(3) . ?
O4 C26 1.243(3) . ?
O5 C35 1.370(3) . ?
O5 C31 1.387(3) . ?
O6 C30 1.317(3) . ?
O6 C36 1.438(3) . ?
C1 C2 1.363(3) . ?
C1 C6 1.438(3) . ?
C1 H1 0.9300 . ?
C2 C3 1.380(3) . ?
C3 C4 1.355(3) . ?
C4 C5 1.424(3) . ?
C4 H4 0.9300 . ?
C5 C6 1.351(3) . ?
C5 C9 1.519(3) . ?
C6 C7 1.439(3) . ?
C7 C8 1.551(3) . ?
C8 C9 1.525(3) . ?
C8 C13 1.544(3) . ?
C8 C10 1.576(3) . ?
C9 H9A 0.9700 . ?
C9 H9B 0.9700 . ?
C10 C14 1.510(3) . ?
C10 C11 1.541(3) . ?
C10 H10 0.9800 . ?
C11 C28 1.509(3) . ?
C11 C12 1.540(3) . ?
C11 H11 0.9800 . ?
C12 C26 1.514(3) . ?
C12 C13 1.521(3) . ?
C12 H12 0.9800 . ?
C13 C20 1.548(3) . ?
C13 H13 0.9800 . ?
C14 C19 1.355(3) . ?
C14 C15 1.379(3) . ?
C15 C16 1.396(3) . ?
C15 H15 0.9300 . ?
C16 C17 1.340(3) . ?
C16 H16 0.9300 . ?
C17 C18 1.353(3) . ?
C17 H17 0.9300 . ?
C18 C19 1.473(3) . ?
C18 H18 0.9300 . ?
C19 H19 0.9300 . ?
C20 C21 1.382(3) . ?
C20 C25 1.407(3) . ?
C21 C22 1.364(3) . ?
C21 H21 0.9300 . ?
C22 C23 1.389(3) . ?
C22 H22 0.9300 . ?
C23 C24 1.345(3) . ?
C23 H23 0.9300 . ?
C24 C25 1.344(3) . ?
C24 H24 0.9300 . ?
C25 H25 0.9300 . ?
C26 C27 1.409(3) . ?
C27 C28 1.403(3) . ?
C27 C32 1.450(3) . ?
C28 C29 1.333(3) . ?
C29 C30 1.467(3) . ?
C29 H29 0.9300 . ?
C30 C31 1.447(3) . ?
C31 C32 1.254(3) . ?
C32 H32 0.9300 . ?
C33 H33A 0.9600 . ?
C33 H33B 0.9600 . ?
C33 H33C 0.9600 . ?
C34 H34A 0.9600 . ?
C34 H34B 0.9600 . ?
C34 H34C 0.9600 . ?
C35 H35A 0.9600 . ?
C35 H35B 0.9600 . ?
C35 H35C 0.9600 . ?
C36 H36A 0.9600 . ?
C36 H36B 0.9600 . ?
C36 H36C 0.9600 . ?
 
loop_
 _geom_angle_atom_site_label_1
 _geom_angle_atom_site_label_2
 _geom_angle_atom_site_label_3
 _geom_angle
 _geom_angle_site_symmetry_1
 _geom_angle_site_symmetry_3
 _geom_angle_publ_flag
C2 O1 C33 117.79(18) . . ?
C3 O2 C34 116.01(19) . . ?
C35 O5 C31 118.0(2) . . ?
C30 O6 C36 118.4(2) . . ?
C2 C1 C6 119.1(2) . . ?
C2 C1 H1 120.5 . . ?
C6 C1 H1 120.5 . . ?
C1 C2 C3 119.9(2) . . ?
C1 C2 O1 123.5(2) . . ?
C3 C2 O1 116.5(2) . . ?
C4 C3 C2 122.4(2) . . ?
C4 C3 O2 125.1(2) . . ?
C2 C3 O2 112.5(2) . . ?
C3 C4 C5 118.3(2) . . ?
C3 C4 H4 120.9 . . ?
C5 C4 H4 120.9 . . ?
C6 C5 C4 120.5(2) . . ?
C6 C5 C9 111.4(2) . . ?
C4 C5 C9 128.0(2) . . ?
C5 C6 C1 119.7(2) . . ?
C5 C6 C7 111.0(2) . . ?
C1 C6 C7 129.2(2) . . ?
O3 C7 C6 129.4(2) . . ?
O3 C7 C8 122.8(2) . . ?
C6 C7 C8 107.8(2) . . ?
C9 C8 C13 117.1(2) . . ?
C9 C8 C7 104.1(2) . . ?
C13 C8 C7 113.13(18) . . ?
C9 C8 C10 116.49(19) . . ?
C13 C8 C10 97.30(19) . . ?
C7 C8 C10 108.8(2) . . ?
C5 C9 C8 104.56(19) . . ?
C5 C9 H9A 110.8 . . ?
C8 C9 H9A 110.8 . . ?
C5 C9 H9B 110.8 . . ?
C8 C9 H9B 110.8 . . ?
H9A C9 H9B 108.9 . . ?
C14 C10 C11 116.4(2) . . ?
C14 C10 C8 114.3(2) . . ?
C11 C10 C8 105.4(2) . . ?
C14 C10 H10 106.7 . . ?
C11 C10 H10 106.7 . . ?
C8 C10 H10 106.7 . . ?
C28 C11 C12 103.6(2) . . ?
C28 C11 C10 113.7(2) . . ?
C12 C11 C10 102.7(2) . . ?
C28 C11 H11 112.1 . . ?
C12 C11 H11 112.1 . . ?
C10 C11 H11 112.1 . . ?
C26 C12 C13 116.3(2) . . ?
C26 C12 C11 106.4(2) . . ?
C13 C12 C11 107.1(2) . . ?
C26 C12 H12 108.9 . . ?
C13 C12 H12 108.9 . . ?
C11 C12 H12 108.9 . . ?
C12 C13 C8 107.31(19) . . ?
C12 C13 C20 116.5(2) . . ?
C8 C13 C20 113.3(2) . . ?
C12 C13 H13 106.4 . . ?
C8 C13 H13 106.4 . . ?
C20 C13 H13 106.4 . . ?
C19 C14 C15 119.4(3) . . ?
C19 C14 C10 123.9(2) . . ?
C15 C14 C10 116.7(2) . . ?
C14 C15 C16 121.2(3) . . ?
C14 C15 H15 119.4 . . ?
C16 C15 H15 119.4 . . ?
C17 C16 C15 118.1(3) . . ?
C17 C16 H16 121.0 . . ?
C15 C16 H16 121.0 . . ?
C16 C17 C18 125.3(3) . . ?
C16 C17 H17 117.3 . . ?
C18 C17 H17 117.3 . . ?
C17 C18 C19 115.3(2) . . ?
C17 C18 H18 122.3 . . ?
C19 C18 H18 122.3 . . ?
C14 C19 C18 120.5(2) . . ?
C14 C19 H19 119.7 . . ?
C18 C19 H19 119.7 . . ?
C21 C20 C25 115.1(3) . . ?
C21 C20 C13 125.0(2) . . ?
C25 C20 C13 119.8(2) . . ?
C22 C21 C20 121.6(3) . . ?
C22 C21 H21 119.2 . . ?
C20 C21 H21 119.2 . . ?
C21 C22 C23 121.6(3) . . ?
C21 C22 H22 119.2 . . ?
C23 C22 H22 119.2 . . ?
C24 C23 C22 117.0(3) . . ?
C24 C23 H23 121.5 . . ?
C22 C23 H23 121.5 . . ?
C25 C24 C23 122.3(3) . . ?
C25 C24 H24 118.8 . . ?
C23 C24 H24 118.8 . . ?
C24 C25 C20 122.3(3) . . ?
C24 C25 H25 118.9 . . ?
C20 C25 H25 118.9 . . ?
O4 C26 C27 126.3(3) . . ?
O4 C26 C12 125.0(3) . . ?
C27 C26 C12 108.0(2) . . ?
C28 C27 C26 111.5(3) . . ?
C28 C27 C32 116.9(3) . . ?
C26 C27 C32 131.5(3) . . ?
C29 C28 C27 121.6(3) . . ?
C29 C28 C11 128.0(3) . . ?
C27 C28 C11 110.3(3) . . ?
C28 C29 C30 120.0(3) . . ?
C28 C29 H29 120.0 . . ?
C30 C29 H29 120.0 . . ?
O6 C30 C31 118.1(3) . . ?
O6 C30 C29 125.3(3) . . ?
C31 C30 C29 116.6(3) . . ?
C32 C31 O5 128.3(3) . . ?
C32 C31 C30 121.1(3) . . ?
O5 C31 C30 110.6(3) . . ?
C31 C32 C27 123.6(3) . . ?
C31 C32 H32 118.2 . . ?
C27 C32 H32 118.2 . . ?
O1 C33 H33A 109.5 . . ?
O1 C33 H33B 109.5 . . ?
H33A C33 H33B 109.5 . . ?
O1 C33 H33C 109.5 . . ?
H33A C33 H33C 109.5 . . ?
H33B C33 H33C 109.5 . . ?
O2 C34 H34A 109.5 . . ?
O2 C34 H34B 109.5 . . ?
H34A C34 H34B 109.5 . . ?
O2 C34 H34C 109.5 . . ?
H34A C34 H34C 109.5 . . ?
H34B C34 H34C 109.5 . . ?
O5 C35 H35A 109.5 . . ?
O5 C35 H35B 109.5 . . ?
H35A C35 H35B 109.5 . . ?
O5 C35 H35C 109.5 . . ?
H35A C35 H35C 109.5 . . ?
H35B C35 H35C 109.5 . . ?
O6 C36 H36A 109.5 . . ?
O6 C36 H36B 109.5 . . ?
H36A C36 H36B 109.5 . . ?
O6 C36 H36C 109.5 . . ?
H36A C36 H36C 109.5 . . ?
H36B C36 H36C 109.5 . . ?
 
_diffrn_measured_fraction_theta_max    0.777
_diffrn_reflns_theta_full              33.27
_diffrn_measured_fraction_theta_full   0.777
_refine_diff_density_max    0.134
_refine_diff_density_min   -0.126
_refine_diff_density_rms    0.029
